# Supplementary material
Source: PubMed Central journal article supplement (PMC3916660)
Supplement: supp_O112.025486_mcp.O112.025486-1.pdf [file supp_O112.025486_mcp.O112.025486-1.pdf]

**Figure S1: Scheme describing the masked selection procedure.** Non relevant (normal) antigens are depicted as empty black shapes, immobilized onto a surface. Relevant (i.e. cancer specific) antigen is depicted as a full black star. A phage-sdAb library is used to select binders against the non-relevant sample. Corresponding sdAbs are produced, purified and added in a large excess during a second selection performed with the same library on the relevant sample. Only relevant epitopes are available for binding, leading to the preferential selection of binders against proteins or epitopes absent in the non relevant sample.

**Figure S2: Transfection level.** Expression HER2, mGluR4 or CXCR4 (fused to SNAP and Flag tag) on the surface of HEK cells was followed by flow cytometry. HER2-transfected HEK cells (HEK-HER2), mGluR4-transfected HEK cells (HEK-mGluR4) and CXCR4-transfected HEK cells (HEK-CXCR4) were incubated with anti-Flag mAb (black line) or control isotype (gray line). Captured antibodies were detected using PE-conjugated anti-mouse antibodies. Cells were analyzed by flow cytometry assay on a MACSQuant flow cytometer (Miltenyi). Histograms were overlaid and normalized for peak height to facilitate comparison.

**Figure S3: Specificity analysis of anti-HER2 sdAbs by ELISA.** HER2-Fc recombinant fusion or human Fc portion were covalently immobilized on epoxy magnetic beads. Soluble sdAbs were incubated. After washing, bound sdAbs were detected using a HRP-labeled anti-6his mAb. anti-Fc: anti human Fc sdAb used as positive control.

**Figure S4: Characterization of anti-HER2 binders by flow cytometry.** **A)** All selected phage-sdAbs were incubated with HER2<sup>+</sup> SKOV3 cells. After washing, bound phage were detected using PE-conjugated anti-M13 mAb. Cells were analyzed by flow cytometry assay on a MACSQuant flow cytometer (Miltenyi). anti-Fc: anti-human Fc sdAb used as negative control. **B)** Competition flow cytometry assay. Cells were incubated with phage-sdAbs in the presence of an excess of soluble anti-HER2 sdAbs C.E4, A.E4 or A.H10. Bound phage were detected as in A). **C)** Phage-sdAbs and sdAbs able to compete (sharing overlapping epitopes) were classified into 3 groups.

**Fig S5: Affinity analysis of sdAbs selected on cell surface antigens by HTRF.** Various concentrations of sdAbs were incubated on transfected and labeled cells and binding was followed by FRET as for Fig 2. Dissociation constants were calculated using a non-linear curve fitting software (Prism, GraphPad). **A)** Dose response curves obtained by anti-HER2 sdAbs incubated on cells transfected with SNAP-HER2 fusions. **B)** Calculated  $K_D$  of anti-HER2 sdAbs. **C)** Dose response curves obtained with anti-mGluR4 sdAbs incubated on cells transfected with SNAP-mGluR4 fusions. **D)** Calculated  $K_D$  of anti-HER2 sdAbs. **E)** Dose response curves obtained with anti-CXCR4 sdAbs incubated on cells transfected with SNAP-CXCR4 fusions. **F)** Calculated  $K_D$  of anti-CXCR4 sdAbs.

**Fig S6: Sequences and epitope analysis of sdAbs targeting overexpressed targets.** **A)** Amino acid sequences and frequency of biopsy specific binders. Only complementarity determining regions CDR1, CDR2 and CDR3 are represented. **B)** Phage ELISA competition assays (in the presence of an excess of soluble sdAbs) were performed with all different biopsy lysate binders to determine competitive sdAbs sharing overlapping epitopes. **C)** Amino acid sequences and frequency of cell surface marker-specific sdAbs. Only CDR1, CDR2 and CDR3 are represented. **D)** A flow cytometry competition assay using phage-sdAbs in the presence of soluble sdAbs was performed to determine competitive clones.

Figure S1

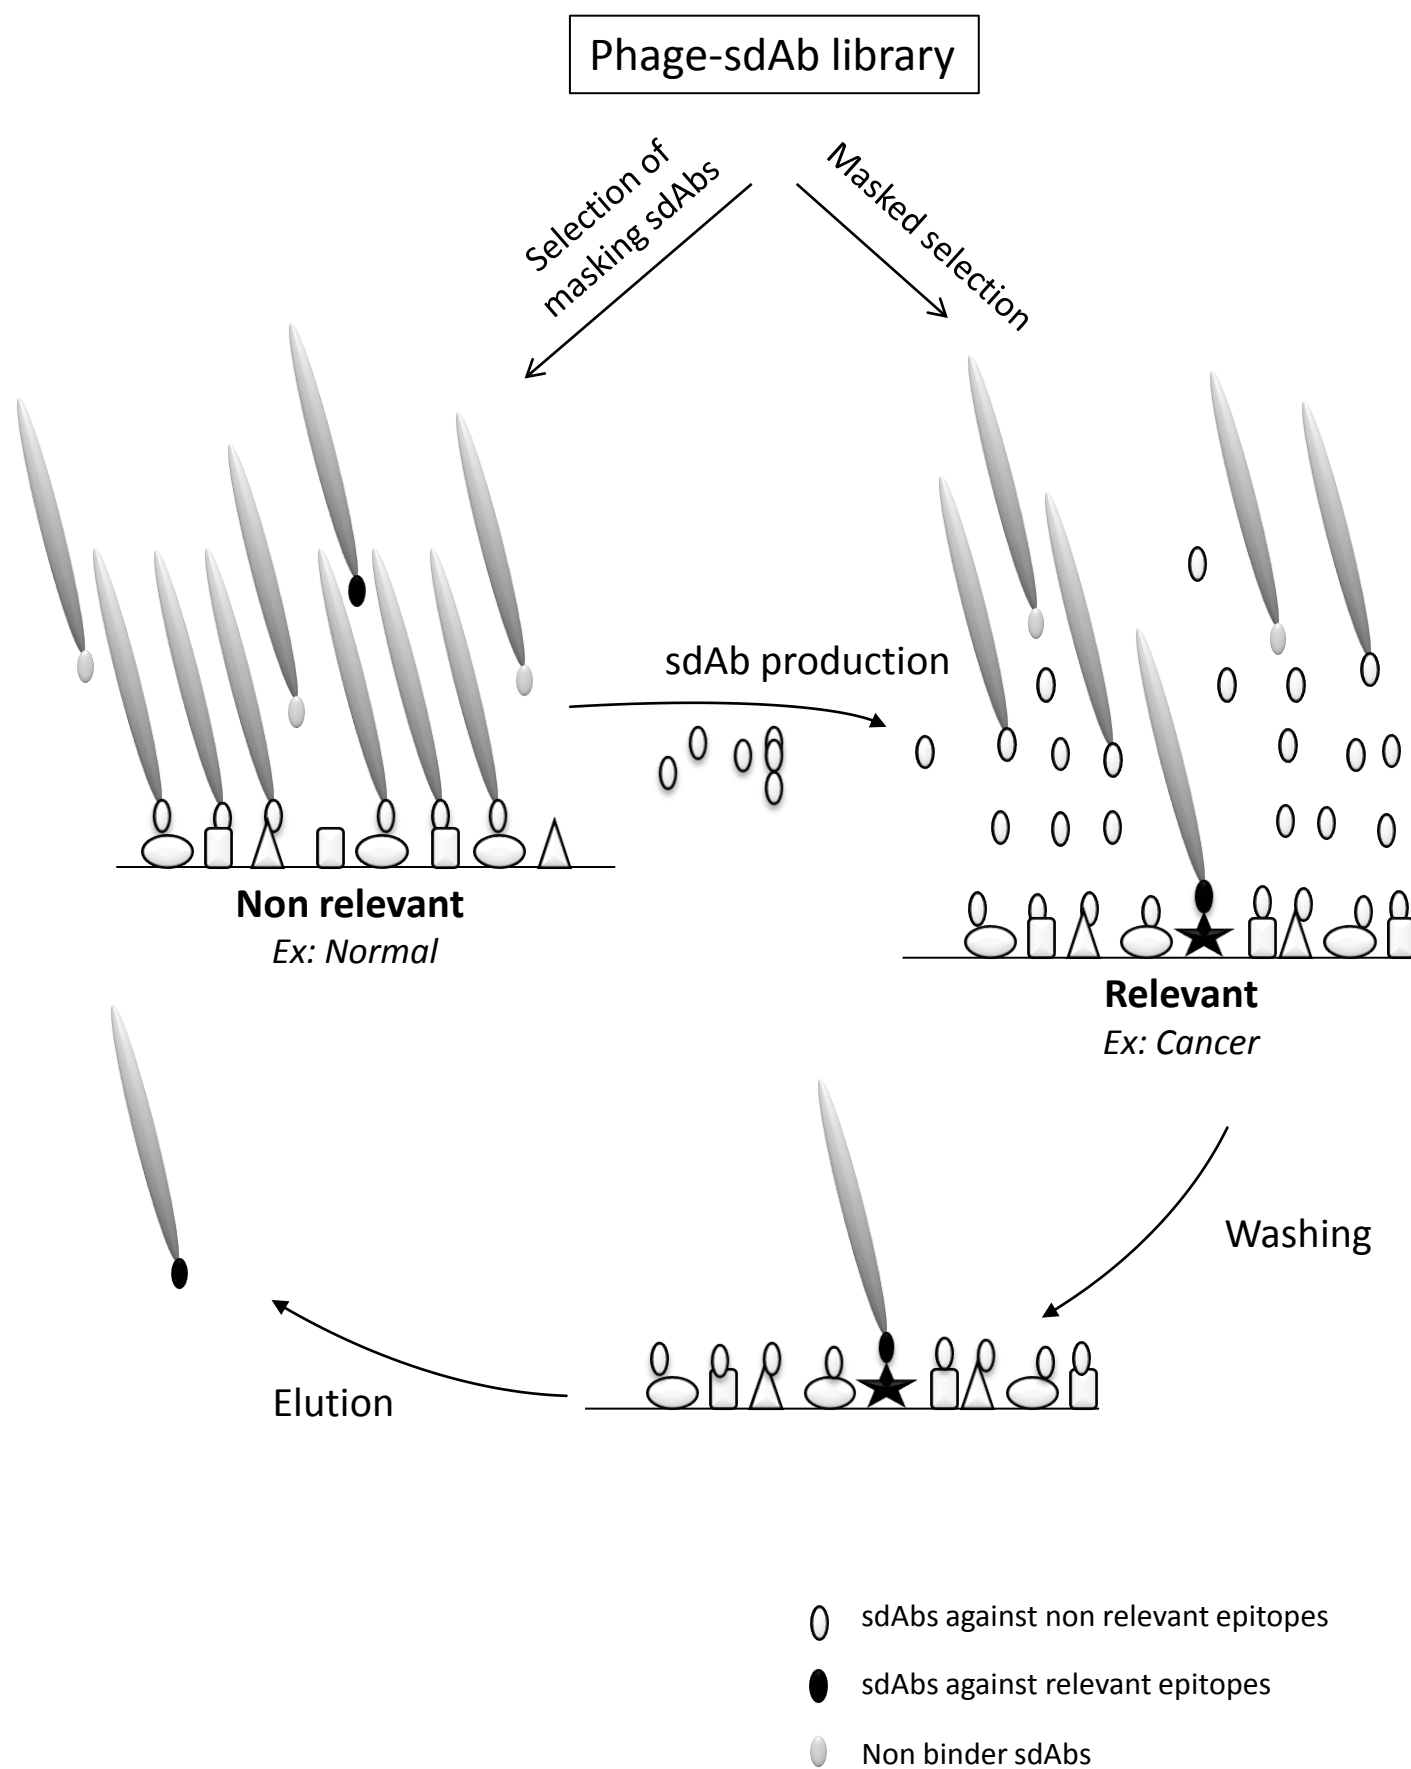

Figure S2

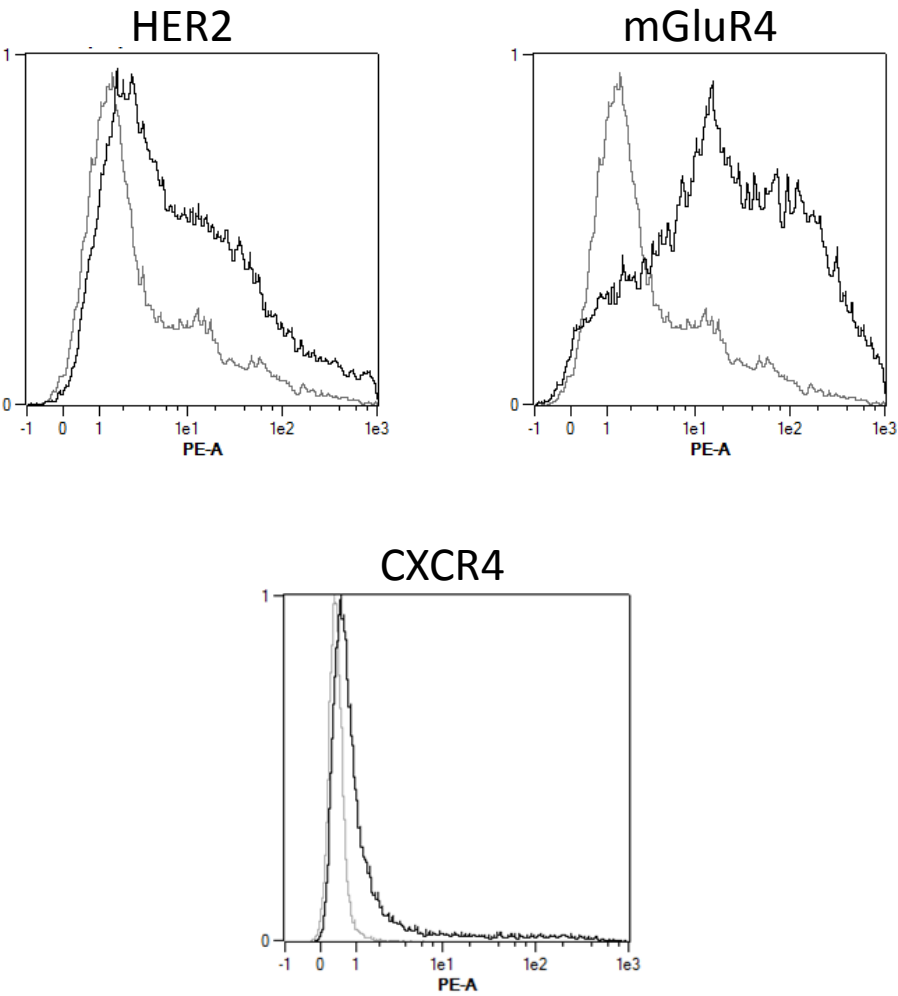

Figure S3

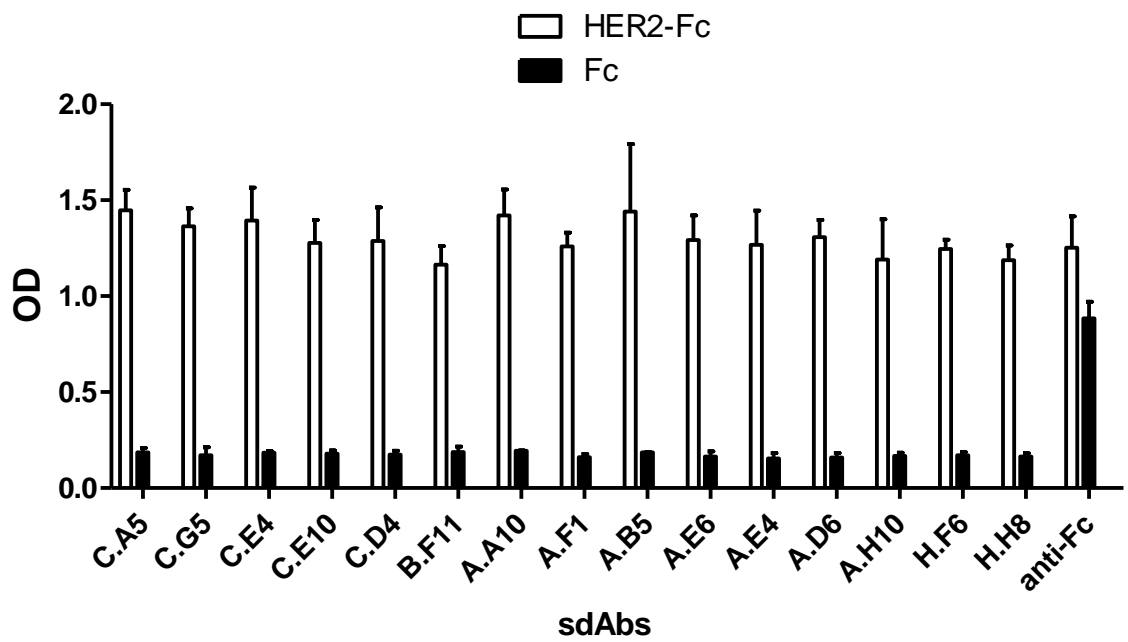

Figure S4

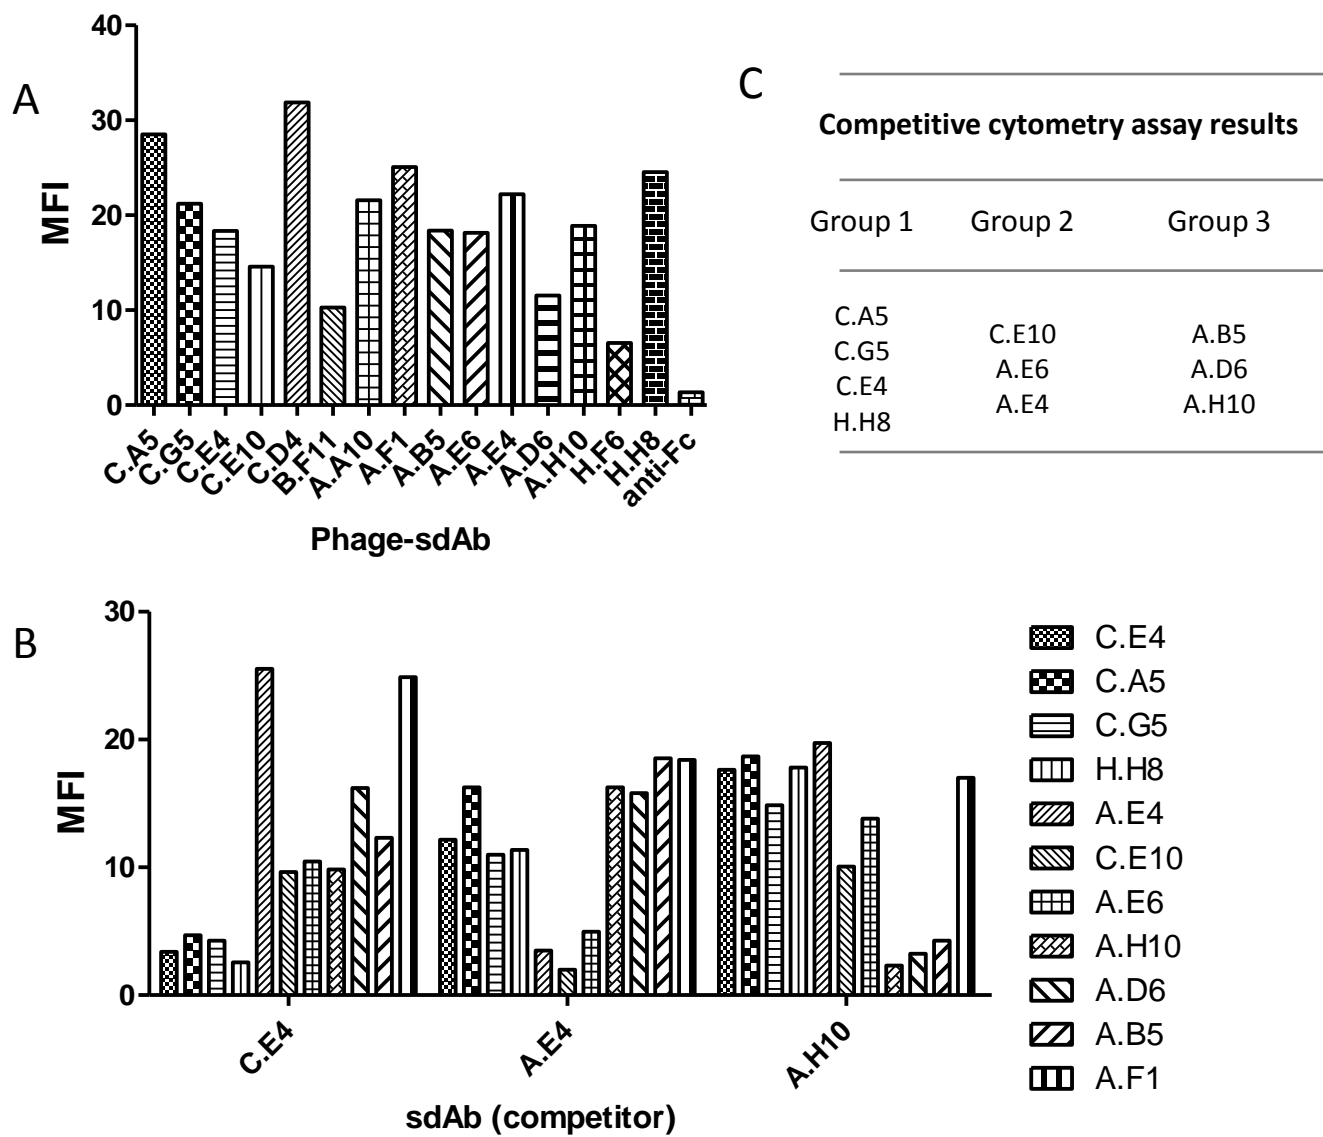

Figure S5

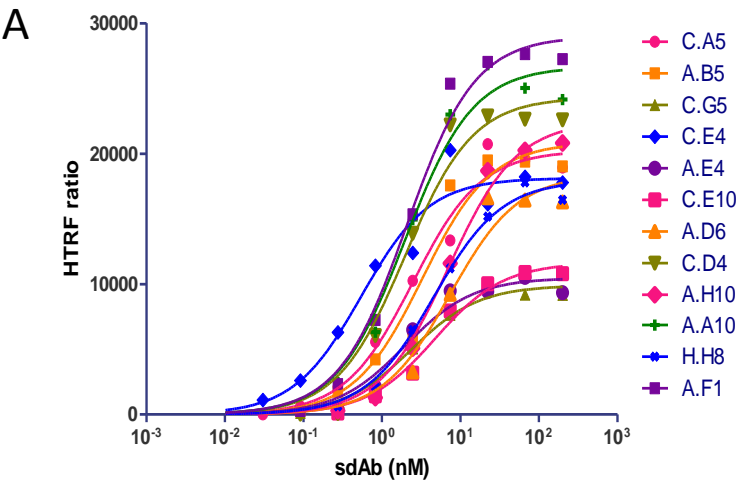

**B**

| sdAb  | $K_D$ (nM) |
|-------|------------|
| A.A10 | 2.7        |
| A.F1  | 2.2        |
| A.B5  | 3.2        |
| A.E4  | 1.9        |
| A.D6  | 7.3        |
| A.H10 | 7          |
| C.A5  | 2.4        |
| C.E4  | 0.5        |
| C.D4  | 2          |
| C.G5  | 2.3        |
| C.E10 | 4.7        |
| H.H8  | 5.3        |

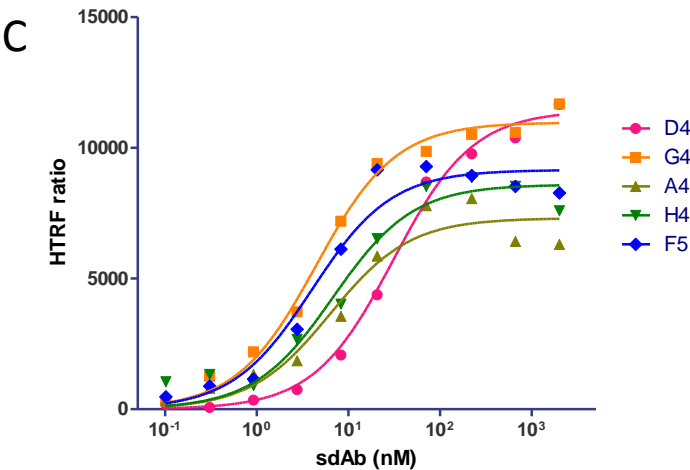

**D**

| sdAb | $K_D$ (nM) |
|------|------------|
| H4   | 6.8        |
| A4   | 6.3        |
| D4   | 30         |
| F5   | 3.9        |
| G4   | 4.4        |

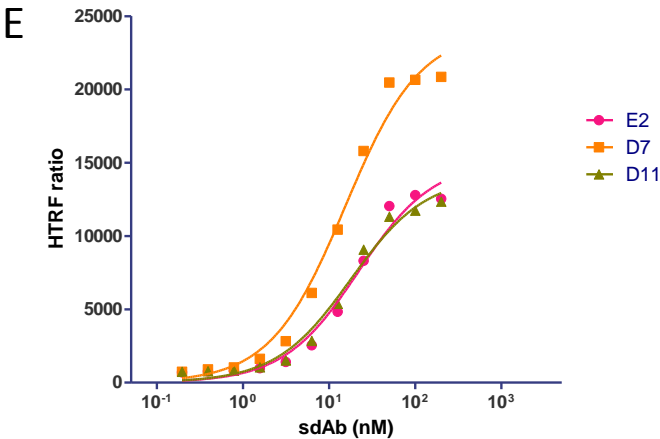

**F**

| sdAb       | $K_D$ (nM) |
|------------|------------|
| <b>E2</b>  | <b>22</b>  |
| <b>D7</b>  | <b>15</b>  |
| <b>D11</b> | <b>17</b>  |

Figure S6

A

| Name  | CDR1     | CDR2     | CDR3                | Frequency |
|-------|----------|----------|---------------------|-----------|
| J.A4  | GDTFSRYR | VTIDGAT  | NALNREGPFY          | x1        |
| J.C1  | GSIFSINF | IDSRGSLN | RSFGTGGDY           | x45       |
| J.D9  | GSIKSIGT | ITSGGST  | TADVLYMRKTTYARDTF   | x1        |
| J.F3  | GRTFSNYA | INGSGSSI | AAVRWGGSRHNGKYDS    | x1        |
| J.F8  | GLTFANYH | ISRSSDTT | AAAPYWYGSAWSSAAVDY  | x1        |
| J.G9  | GSIKSIGA | ITSGGST  | TADVLYYSGGYARDAY    | x1        |
| J.H6  | GRTFST   | ITWSGITT | AVKKRSPAGWTTSTADYDP | x1        |
| J.H4  | GRTFDNYV | IIWSSGST | AAHPYGLIRRLHQPDEYRY | x1        |
| J.G12 | GFTFSIYY | IDSSGGST | ARGPGTSWYWPWGY      | x1        |

B

| Competitive ELISA results |      |       |                        |      |      |      |
|---------------------------|------|-------|------------------------|------|------|------|
| Group 1                   |      |       | Non competitive clones |      |      |      |
| J.C1                      | J.D9 | J.G12 | J.A4                   | J.F8 | J.G9 | J.H6 |
| J.F3                      |      |       | J.H4                   |      |      |      |

C

| Name  | CDR1      | CDR2     | CDR3                 | Frequency |
|-------|-----------|----------|----------------------|-----------|
| M.C9  | GATFSRNI  | ITWVRETT | AASVGSRLYGAYHKEGGYDY | x1        |
| M.B9  | GPSFLLYA  | ITYIGGST | AASGHSYSDSANQYDD     | x1        |
| M.E10 | TSVFSIDT  | ITSGGST  | KAITTRWDRTSDSY       | x1        |
| M.D5  | GSISSRNT  | QASGSYI  | YLSQYSGSY            | x4        |
| M.D7  | GMIFSNYG  | ITRGGST  | YANTN                | x1        |
| M.H3  | GIIVSIRS  | ITGRGST  | NTRRQPLP             | x1        |
| M.H12 | GSSISSIA  | ISSGGTI  | NTGRRLQTGS           | x1        |
| M.A9  | GSIFEIND  | ITGRST   | KADHSTYDNWNNENY      | x1        |
| M.A4  | EISVSIKS  | VISGRSP  | NLHTWSGYDY           | x1        |
| M.F5  | ESTFSSNA  | ISPGGSA  | YSRFR                | x2        |
| M.H11 | GRTL SAYT | LVGSADNT | AAKWRTDY YRDPENYAY   | x1        |

D

| Competitive cytometry assay results |       |         |      |                        |      |
|-------------------------------------|-------|---------|------|------------------------|------|
| Group 1                             |       | Group 2 |      | Non competitive clones |      |
| M.H11                               | M.E10 | M.A9    | M.C9 | M.B9                   | M.D5 |
| M.A4                                | M.D7  | M.H12   | M.F5 | M.H3                   |      |
